# Supplementary material
Source: MDPI journal article supplement (https://www.mdpi.com/2073-4395/10/11/1841)
Supplement: s1 [file s1]

Table S1. Detail of crop husbandry practices during rice crop season in 2017 and 2018.

| Year                                                                     | 2017           |                |                        |                |                |                |                |                |                                     |                |                |                | 2018           |                |                        |                |                |                |                |                                     |                        |                |                |                |
|--------------------------------------------------------------------------|----------------|----------------|------------------------|----------------|----------------|----------------|----------------|----------------|-------------------------------------|----------------|----------------|----------------|----------------|----------------|------------------------|----------------|----------------|----------------|----------------|-------------------------------------|------------------------|----------------|----------------|----------------|
| PS                                                                       | DDSR           |                |                        |                |                |                | TPR            |                |                                     |                |                |                | DDSR           |                |                        |                |                |                | TPR            |                                     |                        |                |                |                |
|                                                                          | N <sub>1</sub> | N <sub>2</sub> | N <sub>3</sub>         | N <sub>4</sub> | N <sub>5</sub> | N <sub>6</sub> | N <sub>1</sub> | N <sub>2</sub> | N <sub>3</sub>                      | N <sub>4</sub> | N <sub>5</sub> | N <sub>6</sub> | N <sub>1</sub> | N <sub>2</sub> | N <sub>3</sub>         | N <sub>4</sub> | N <sub>5</sub> | N <sub>6</sub> | N <sub>1</sub> | N <sub>2</sub>                      | N <sub>3</sub>         | N <sub>4</sub> | N <sub>5</sub> | N <sub>6</sub> |
| Nitrogen management                                                      |                |                |                        |                |                |                |                |                |                                     |                |                |                |                |                |                        |                |                |                |                |                                     |                        |                |                |                |
| Soaking (Rauni) irrigation                                               |                |                | 3 June                 |                |                |                |                |                | 5 July                              |                |                |                |                |                | 22 June                |                |                |                |                |                                     | 20 July                |                |                |                |
| Land preparation                                                         |                |                | 6 June                 |                |                |                |                |                | -                                   |                |                |                |                |                | 26 June                |                |                |                |                |                                     | -                      |                |                |                |
| 2 Ploughing + 1 Planking                                                 |                |                |                        |                |                |                |                |                |                                     |                |                |                |                |                |                        |                |                |                |                |                                     |                        |                |                |                |
| Puddling (1 rotavator + 3 cultivation + 2 levelling)                     |                |                | -                      |                |                |                |                |                | 7 July                              |                |                |                |                |                | -                      |                |                |                |                |                                     | 26 July                |                |                |                |
| Nursery sowing for transplanted rice                                     |                |                | -                      |                |                |                |                |                | 6 June                              |                |                |                |                |                | -                      |                |                |                |                |                                     | 27 June                |                |                |                |
| Sowing of dry-direct seeded rice                                         |                |                | 7 June                 |                |                |                |                |                | -                                   |                |                |                |                |                | 27 June                |                |                |                | -              |                                     |                        |                |                |                |
| Seed rate                                                                |                |                | 30 kg ha <sup>-1</sup> |                |                |                |                |                | 10 kg ha <sup>-1</sup>              |                |                |                |                |                | 30 kg ha <sup>-1</sup> |                |                |                |                |                                     | 10 kg ha <sup>-1</sup> |                |                |                |
| Transplanting                                                            |                |                | -                      |                |                |                |                |                | 11 July                             |                |                |                |                |                | -                      |                |                |                |                |                                     | 27 July                |                |                |                |
| Fertilizers application for nursery                                      |                |                | -                      |                |                |                |                |                | N: P @ 120: 80: kg ha <sup>-1</sup> |                |                |                |                |                | -                      |                |                |                |                | N: P @ 120: 80: kg ha <sup>-1</sup> |                        |                |                |                |
| Fertilizers application                                                  |                |                |                        |                |                |                |                |                |                                     |                |                |                |                |                |                        |                |                |                |                |                                     |                        |                |                |                |
| Weed management                                                          |                |                |                        |                |                |                |                |                |                                     |                |                |                |                |                |                        |                |                |                |                |                                     |                        |                |                |                |
| N application kg ha <sup>-1</sup> as basal                               | 0              | 50             | 100                    | 150            | 40             | 60             | 0              | 50             | 100                                 | 150            | 40             | 60             | 0              | 50             | 100                    | 150            | 40             | 60             | 0              | 50                                  | 100                    | 150            | 40             | 60             |
| 2 <sup>nd</sup> Split of N at effective tillering (kg ha <sup>-1</sup> ) | -              | -              | -                      | -              | 30             | 45             | -              | -              | -                                   | -              | 30             | 45             | -              | -              | -                      | -              | 30             | 45             | -              | -                                   | -                      | -              | 30             | 45             |
| 3 <sup>rd</sup> split of N at PI stage (kg ha <sup>-1</sup> )            | -              | -              | -                      | -              | 30             | 45             | -              | -              | -                                   | -              | 30             | 45             | -              | -              | -                      | -              | 30             | 45             | -              | -                                   | -                      | -              | 30             | 45             |
| Harvesting                                                               |                |                | 17 October             |                |                |                |                |                | 24 October                          |                |                |                |                |                | 26 October             |                |                |                |                |                                     | 06 November            |                |                |                |

PS= production system; DDSR= dry-direct seeded rice; TPR= transplanted rice; N = nitrogen; P = Phosphorous; K = potassium; Zn = Zinc; N<sub>1</sub> (0 kg ha<sup>-1</sup> N= Control); N<sub>2</sub> (50 kg ha<sup>-1</sup> N as basal); N<sub>3</sub> (100 kg ha<sup>-1</sup> N as basal); N<sub>4</sub> (150 kg ha<sup>-1</sup> N as basal); N<sub>5</sub> (100 kg ha<sup>-1</sup> N in three splits); N<sub>6</sub> (150 kg ha<sup>-1</sup> N in three splits)

Table S2. Variance components, the mean sum of square values and Tukey's HSD values ( $p \leq 0.05$ ) for biochemical and cooking quality traits of aromatic rice under different nitrogen management pattern and production systems.

| Variance components | DF | Protein contents (%) |                     | WAR                |                     | Amylose contents (%) |                    | Bursting (%)       |                    | Curling (%)        |                    | Elongation ratio   |                    | CGL (%)             |                     |
|---------------------|----|----------------------|---------------------|--------------------|---------------------|----------------------|--------------------|--------------------|--------------------|--------------------|--------------------|--------------------|--------------------|---------------------|---------------------|
|                     |    | 2017                 | 2018                | 2017               | 2018                | 2017                 | 2018               | 2017               | 2018               | 2017               | 2018               | 2017               | 2018               | 2017                | 2018                |
| $V_{PS}$            | 1  | 0.015 <sup>Ns</sup>  | 0.005 <sup>Ns</sup> | 0.23 <sup>Ns</sup> | 0.139 <sup>Ns</sup> | 6.56 <sup>Ns</sup>   | 5.61 <sup>Ns</sup> | 9.00*              | 12.7**             | 6.42 <sup>Ns</sup> | 6.59*              | 3.48 <sup>Ns</sup> | 3.42*              | 0.001 <sup>Ns</sup> | 0.001 <sup>Ns</sup> |
| $V_{NM}$            | 5  | 16.185**             | 19.08**             | 6.04**             | 7.396**             | 6.20*                | 6.67**             | 35.5**             | 36.3**             | 13.7**             | 11.8**             | 36.5**             | 28.6**             | 0.293**             | 0.253**             |
| $V_{PS \times NM}$  | 5  | 0.003 <sup>Ns</sup>  | 0.004 <sup>Ns</sup> | 0.01 <sup>Ns</sup> | 0.004 <sup>Ns</sup> | 0.34 <sup>Ns</sup>   | 0.23 <sup>Ns</sup> | 0.07 <sup>Ns</sup> | 0.01 <sup>Ns</sup> | 0.11 <sup>Ns</sup> | 0.21 <sup>Ns</sup> | 0.15 <sup>Ns</sup> | 0.10 <sup>Ns</sup> | 0.004 <sup>Ns</sup> | 0.002 <sup>Ns</sup> |

DF= Degree of freedom; PS= Production system; NM= Nitrogen management; WAR= Water absorption ratio; CGL= Cooked grain length \*= Significant at the 0.05 probability level; \*\*= Significant at the 0.01 probability level; Ns= Non-significant at 0.05 probability level by the Tukey's HSD test
